# Supplementary material for: A novel GLP-1 and FGF21 dual agonist has therapeutic potential for diabetes and non-alcoholic steatohepatitis
Source: PubMed Central journal article supplement — eBioMedicine. 2021 Jan 7;63:103202. doi: 10.1016/j.ebiom.2020.103202 (PMC7806870; doi:10.1016/j.ebiom.2020.103202), 2021-01-07
Supplement: mmc1.pdf [file mmc1.pdf]

Supplementary

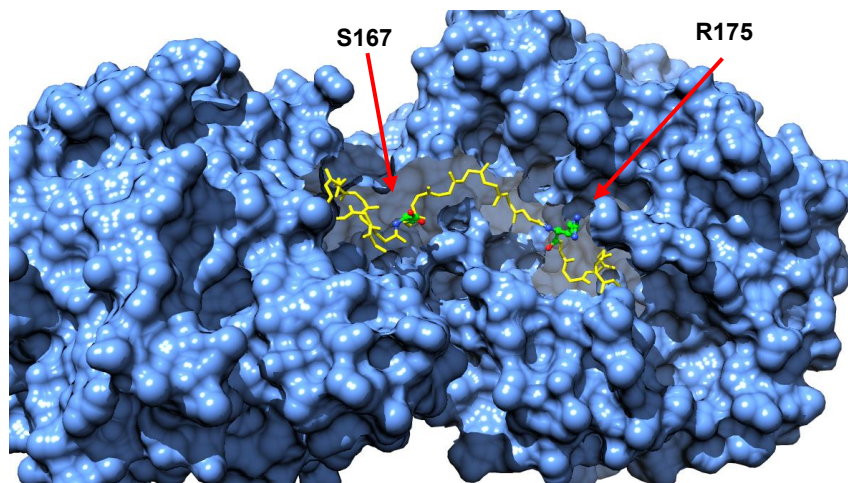

**Supplementary Fig. 1 Structure of FGF21 C-terminal tail in complex with  $\beta$ -klotho (PDB:5VAQ).** KLB (blue) is shown as surface and FGF21 C-tail (yellow) is shown as backbone stick representations. S167 and R175 (green) are labeled and shown as ball & stick representation.

**a**

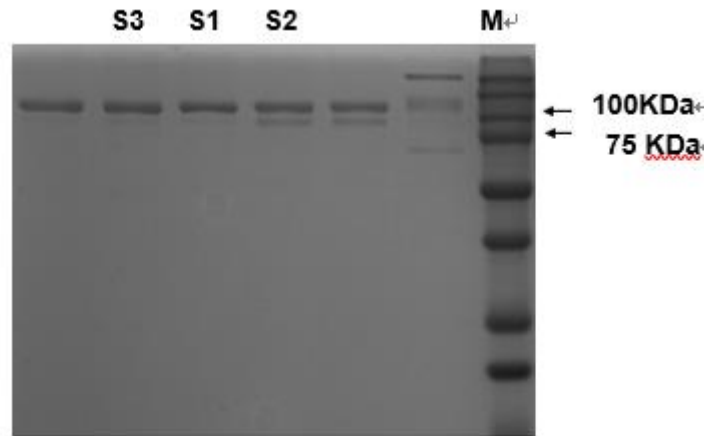

**b**

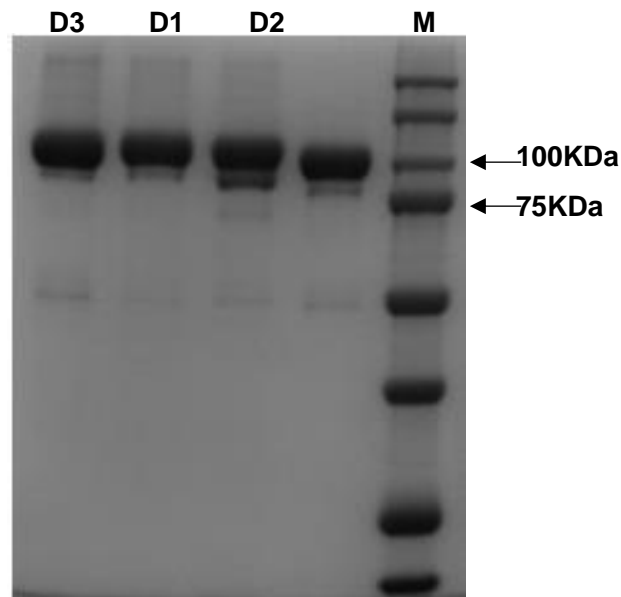

**c**

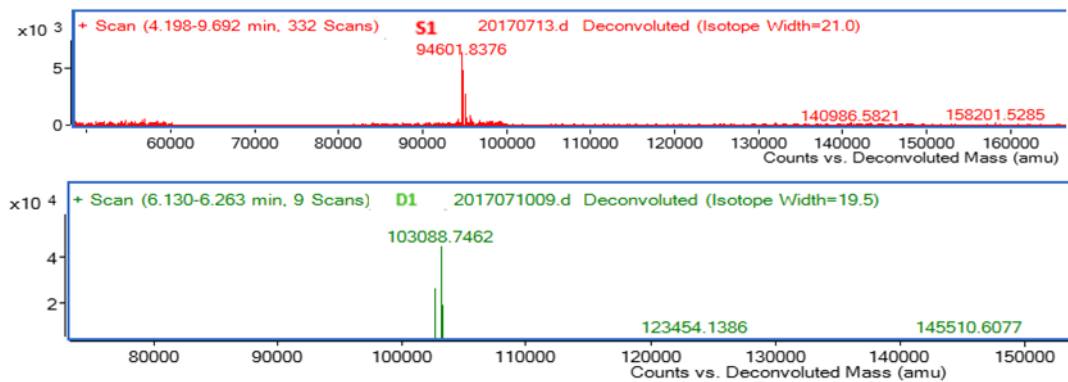

**Supplementary Fig. 2** Characterization of FGF21 fusion proteins. a. SDS PAGE of Fc-FGF21 purified by protein A column affinity chromatography. b. SDS PAGE of GLP-1-Fc-FGF21 purified by protein A column affinity chromatography. c. The mass spectrometry

detection diagrams of Fc-FGF21 S1 and GLP-1-Fc-FGF21 D1 fusion proteins. The mass spectra are assigned to the corresponding m/z values.

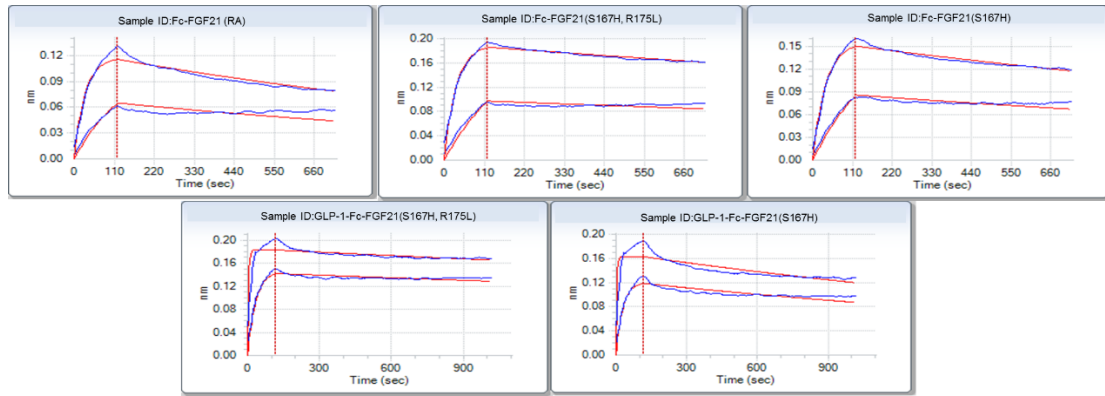

**Supplementary Fig. 3** Kinetic analysis of the interaction between FGF21 mutants and  $\beta$ -Klotho. Data were processed and curve fit using a 1:1 binding model.

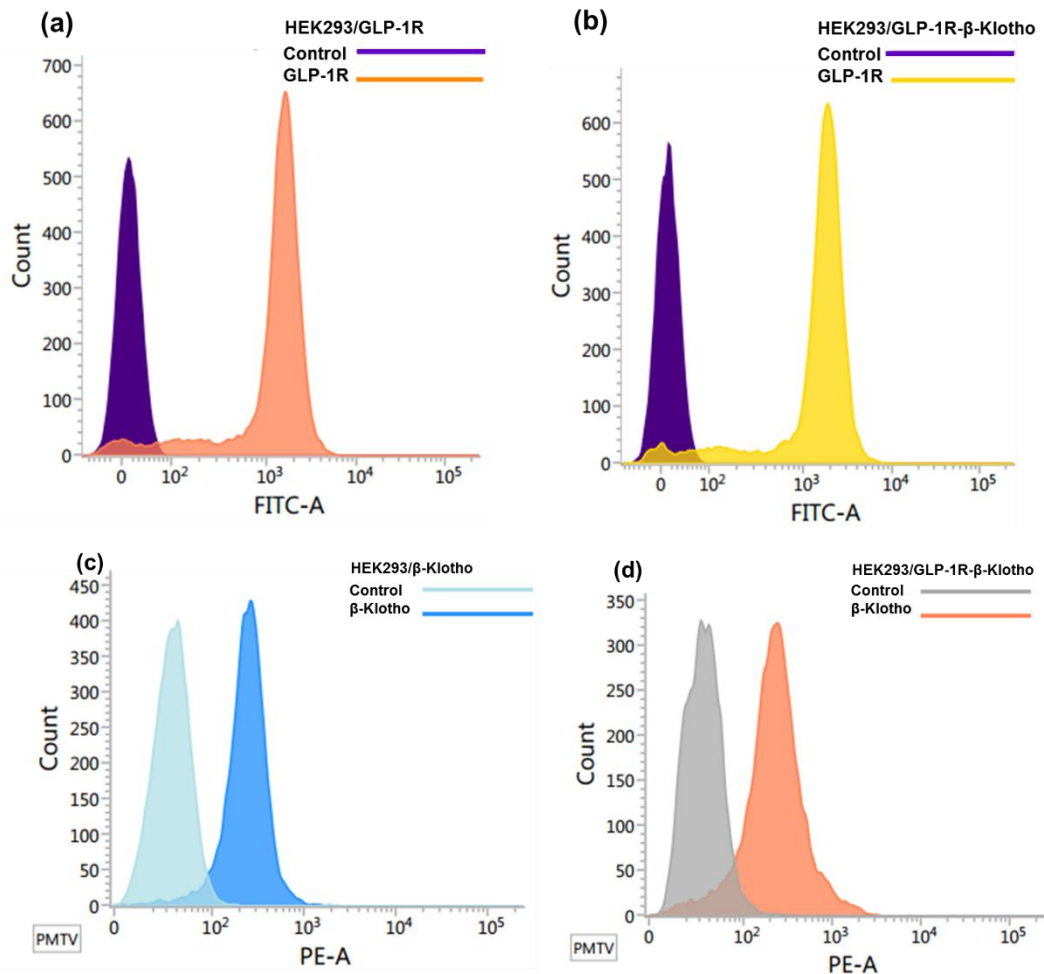

**Supplementary Fig. 4** The receptor expression of HEK293/GLP-1R, HEK293/ $\beta$ -Klotho or HEK293/GLP-1R- $\beta$ -Klotho were assessed by flow cytometry analysis. (a) Data shown are representative histograms from flow cytometry showing expression for GLP-1R in HEK293/GLP-1R cell line. (b) and for GLP-1R in HEK293/ GLP-1R- $\beta$ -Klotho cell line. (c) and for  $\beta$ -Klotho in HEK293/ $\beta$ -Klotho cell line. (d) and for  $\beta$ -Klotho in HEK293/ GLP-1R- $\beta$ -Klotho cell line. Isotype control antibody at the same concentration was used as a negative control.

(a)

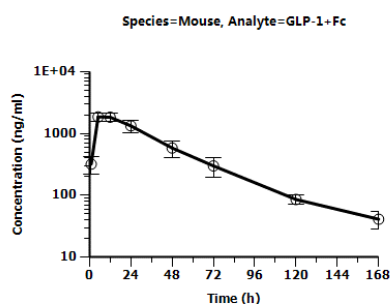

(b)

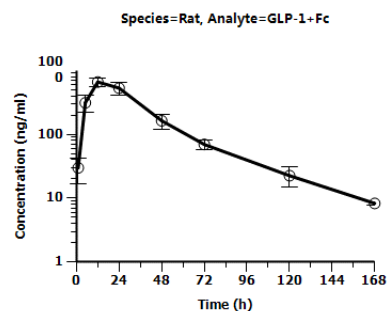

**Supplementary Fig. 5** PK profiles of D1 in mice and rats. (A) Mean plasma concentration-time profiles in mice following single SC administrations at 1 mg/kg. (B) Mean plasma concentration-time profiles in rats following single SC administrations at 0.5 mg/kg. Values presented are Mean  $\pm$  SD with  $n = 5$  for mice and rats.

| Species | Dose (mg/kg) | Route | AUC <sub>last</sub> ( $\mu\text{g}\cdot\text{h}/\text{mL}$ ) | C <sub>max</sub> (ng/mL) | T <sub>max</sub> (h) | MRT (h)        | t <sub>1/2</sub> (h) | CL/F (mL/h/kg) | Vz/F (mL/kg)  |
|---------|--------------|-------|--------------------------------------------------------------|--------------------------|----------------------|----------------|----------------------|----------------|---------------|
| Mouse   | 1            | SC    | 82.2 $\pm$ 16                                                | 2010 $\pm$ 190           | 7.8 $\pm$ 3.8        | 35.5 $\pm$ 2.7 | 30.3 $\pm$ 1.6       | 12.3 $\pm$ 2.6 | 541 $\pm$ 140 |
| Rat     | 0.5          | SC    | 24.9 $\pm$ 4.5                                               | 659 $\pm$ 98             | 12.0 $\pm$ 0.0       | 31.6 $\pm$ 3.3 | 25.9 $\pm$ 2.5       | 20.2 $\pm$ 3.6 | 746 $\pm$ 94  |

**Supplementary Table 4** Pharmacokinetic parameters in C57BL6 mice and Sprague-Dawley rats. Plasma concentrations of D1 were determined with a sandwich ELISA recognizing the N-terminus of the GLP-1 portion and the Fc portion. AUC<sub>last</sub>, area under the curve from the time of dosing to the last measurable concentration; C<sub>max</sub>, maximum observed concentration; T<sub>max</sub>, time to C<sub>max</sub>; MRT, mean residence time; t<sub>1/2</sub>, terminal half-life; CL/F, total body clearance for extravascular administration; Vz/F, volume of distribution as a function of bioavailability. All values are expressed as (Means  $\pm$  SD) with  $n = 5$  for mice and rats.

|              |                                                                                                                                                                                                        |
|--------------|--------------------------------------------------------------------------------------------------------------------------------------------------------------------------------------------------------|
| <b>GLP-1</b> | HGEGTFTSDVSSYLEEQAAKEFIAWLVKGGG                                                                                                                                                                        |
| <b>FGF21</b> | HPIPDSSPLLQFGGQVRQRYLYTDDAQQTEAHLEIREDDGTVGGAADQSPESLLQLKA<br>LKPGVIQILGVKTSRFLCQRPDGALYGS LHFDP EACSF RERLLEDGYNVYQSEAHGLP<br>LHLPGNKSPHRDPAPRGPAPRFLPLPGLPPALPEPPGILAPQPPDVGSSDPLHMVGASQ<br>GLSPSYAS |

**Supplementary Table 5** The sequences for GLP-1 and FGF21 in GLP-1-Fc-FGF21 D1.
